# Supplementary material for: Insight into fast lithium diffusion in disordered rock-salt ω-Li3V2O5in a wide temperature range
Source: Royal Society of Chemistry journal article supplement (doi:10.1039/d2ta08649b), 2023-01-01
Supplement: d2ta08649b1.pdf [file d2ta08649b1.pdf]

*Supplementary material*

**Insight into fast lithium diffusion and interface stability of  
disordered rock-salt  $\omega$ - $\text{Li}_3\text{V}_2\text{O}_5$  anodes in a wide  
temperature range**

Xiwei Lan,<sup>‡</sup> Tao Meng,<sup>‡</sup> Shanshan Yang, and Xianluo Hu\*

*State Key Laboratory of Materials Processing and Die & Mould Technology, School of  
Materials Science and Engineering, Huazhong University of Science and Technology,  
Wuhan 430074, China*

<sup>‡</sup> These authors contributed equally to this work.

\* Corresponding author.

*E-mail address:* [huxl@mial.hust.edu.cn](mailto:huxl@mial.hust.edu.cn) (X. L. Hu)

## 1. Experimental

### 1.1 Materials Preparation

The  $\omega$ -LVO anode was prepared via the electrochemical lithiation of  $V_2O_5$  as previously reported.<sup>1</sup> Commercial  $V_2O_5$  powders (Sigma-Aldrich, USA) were ball-milled for 2 h before used. The  $V_2O_5$  electrodes were prepared by mixing the active material (80 wt%), carbon black (Super P, 10 wt%), PVDF (Sigma-Aldrich, 10 wt%). The mass loading of active materials is about  $1 \text{ mg/cm}^2$ . The CR2032-type half-cells were assembled in an argon atmosphere in a glovebox. When the  $V_2O_5$  electrode was discharged to 1.5 V at  $0.1 \text{ A g}^{-1}$ , a rock-salt  $\omega$ -LVO material was obtained without further operation. The as-prepared  $\omega$ -LVO electrode can be used to carry out the electrochemical test directly.

### 1.2 Characterizations

The morphology of the active materials was observed by scanning electron microscopy (SEM, Sirion 200, FEI, Netherlands). The crystal structure of the  $\omega$ -LVO anode was investigated by transmission electron microscopy (TEM, JEM-2100, JEOL, Japan and TF20, FEI, Netherlands) and X-ray diffraction (XRD, Empyrean, PANalytical B. V., Netherlands).

### 1.3 Electrochemical Measurements

The  $\omega$ -LVO electrode was composed of active material, Super P, and poly(vinylidene fluoride) with a weight ratio of 8:1:1, and the mass loading was  $\sim 1.0 \text{ mg cm}^{-2}$ . The electrolyte components were 1.2 M  $\text{LiPF}_6$  in EC : EMC (3 : 7 in weight ratio) with

2%vol FEC and 1wt% LiPO<sub>2</sub>F<sub>2</sub>. CR2032 coin-type cells were assembled in an argon-filled glove box with the content of H<sub>2</sub>O and O<sub>2</sub> less than 1 ppm. The ω-LVO||Li cells were cycled in the potential range of 0.01 – 2.0 V at the current density of 0.1 – 10 A g<sup>-1</sup> at room temperature (28 °C), which was operated in a battery test system (LAND CT2001A, Land Electronic Co. Ltd, China). Cyclic voltammetry (CV) with different scan rates was applied to obtain the Li-ion diffusion coefficient in the potential range of 0.01 – 2.0 V. EIS of the coin cells was tested in the frequency range of 10<sup>-1</sup> – 10<sup>6</sup> Hz with a voltage amplitude of 10 mV. The CV and EIS tests were accomplished by using the electrochemical workstation (CHI600E, Chinstruments Co. Ltd, China).

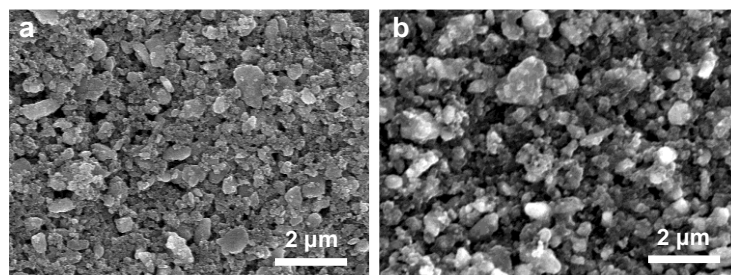

**Fig. S1.** SEM images of the electrodes: (a) Pristine V<sub>2</sub>O<sub>5</sub>. (b) ω-LVO anode.

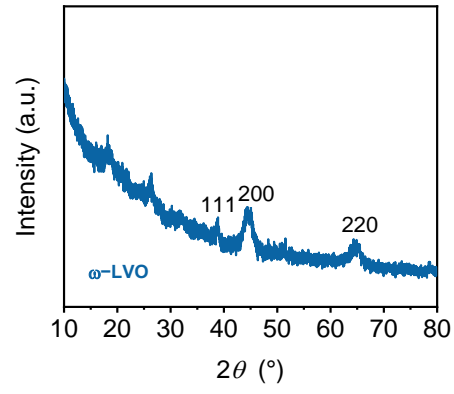

**Fig. S2.** XRD pattern of the as-prepared  $\omega$ -LVO electrode

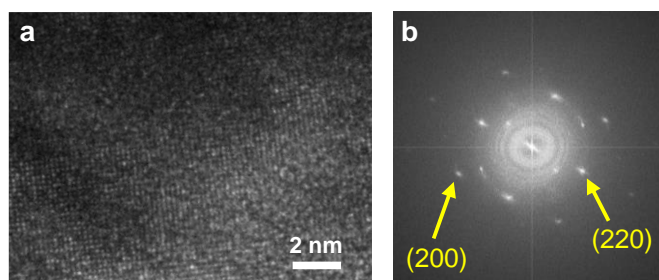

**Fig. S3.** (a) TEM image of the  $\omega$ - $\text{Li}_3\text{V}_2\text{O}_5$  particles obtained by discharging the  $\text{V}_2\text{O}_5$  to 1.5 V vs  $\text{Li}/\text{Li}^+$  and (b) corresponding FFT pattern.

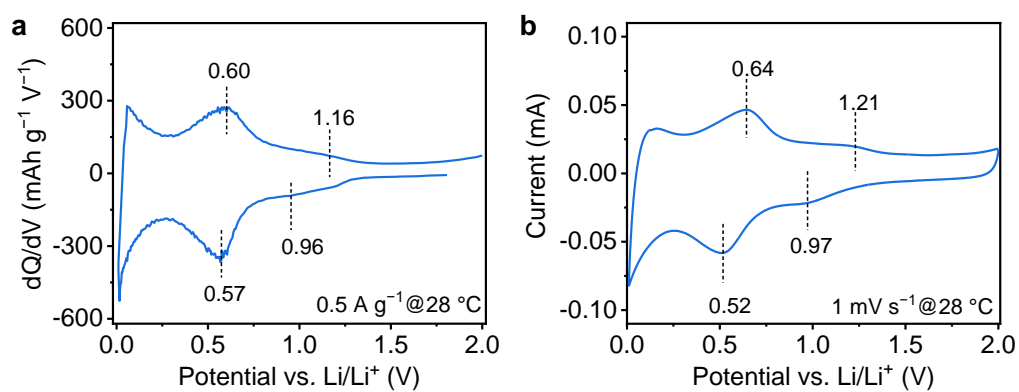

**Fig. S4.** (a)  $dQ/dV$  profiles. (b) CV curves at a scan rate of  $1 \text{ mV s}^{-1}$ .

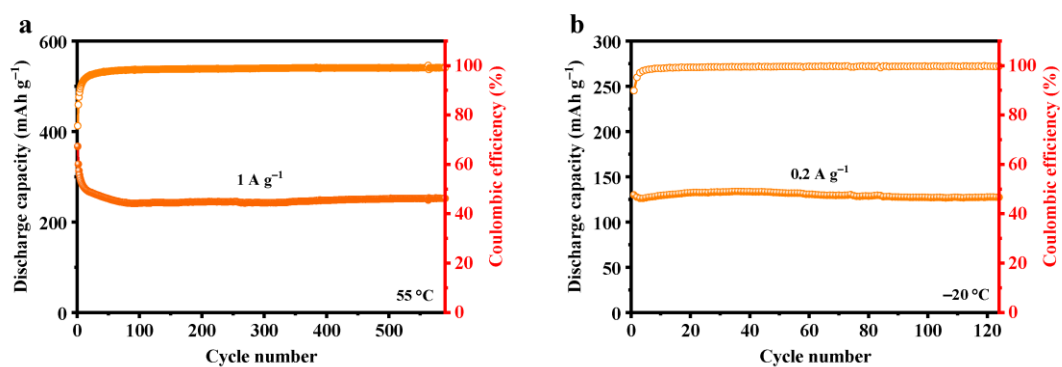

**Fig. S5.** Cycling performance at (a) 55 °C (1 A g<sup>-1</sup>) and (b) -20 °C (0.2 A g<sup>-1</sup>) of the  $\omega$ -LVO||Li half cells.

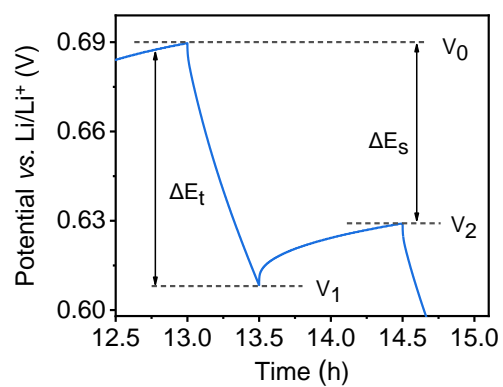

**Fig. S6.** Enlarged region of the GITT curve of the  $\omega$ -LVO||Li half cell.

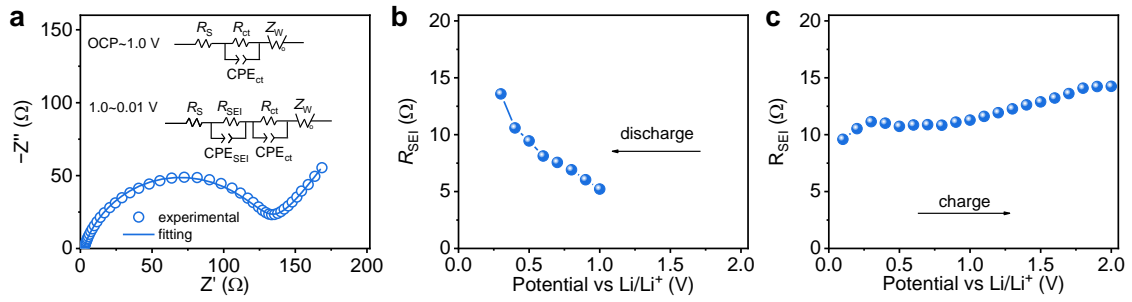

**Fig. S7.** (a) EIS curve and fitting result at OCP. Evolution of  $R_{SEI}$  during initial (b) discharging and (c) charging process.

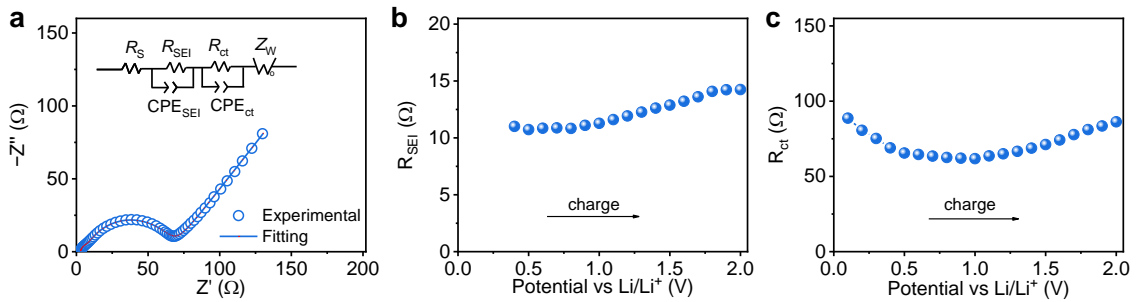

**Fig. S8.** (a) EIS curve and fitting result at 1.0 V. Evolution of  $R_{ct}$  during initial (b) discharging and (c) charging process.

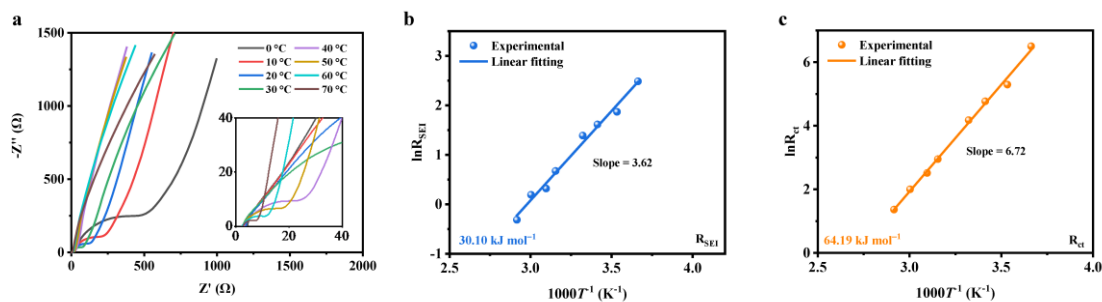

**Fig. S9.** Energy information of the graphite anode. Plots and linear fitting of (a)  $\ln R_{SEI}$  vs.  $1000T^{-1}$  and (b)  $\ln R_{ct}$  vs.  $1000T^{-1}$ .

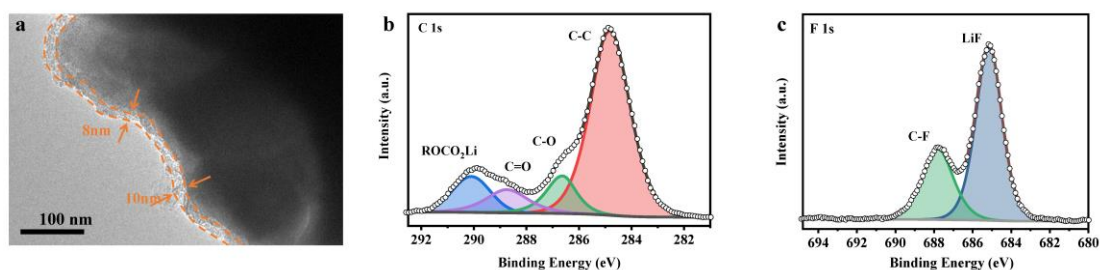

**Fig. S10.** (a) TEM images of the cyclized  $\omega$ -LVO electrodes. XPS results of (b) C1s and (c) F1s of the cyclized  $\omega$ -LVO electrodes.

## References

- 1 H. Liu, Z. Zhu, Q. Yan, S. Yu, X. He, Y. Chen, R. Zhang, L. Ma, T. Liu, M. Li, R. Lin, Y. Chen, Y. Li, X. Xing, Y. Choi, L. Gao, H. S.-y. Cho, K. An, J. Feng, R. Kostecki, K. Amine, T. Wu, J. Lu, H. L. Xin, S. P. Ong and P. Liu, *Nature*, 2020, **585**, 63-67.
